# Supplementary material for: De Novo Assembly and Transcriptome Characterization of Canine Retina Using High-Throughput Sequencing
Source: Genet Res Int. 2015 Dec 16;2015:638679. doi: 10.1155/2015/638679 (PMC4695645; doi:10.1155/2015/638679)
Supplement: Supplementary file 1 — The Additional File S1 contains the generated data after enrichment of genes in GO category. The sheet 4 contains the expression value of expressed genes which were involved in retina specific gene expression profiles. The Additional File S2 contains KEGG orthology assignment of Melanogenesis, phototransduction and retinol metabolism. [file 638679.f1.zip]

Archive with 2 entries (2 files):
- 638679 Additional file S1.xlsx
- 638679 Additional file S2.docx
