# Supplementary material for: De Novo Assembly and Transcriptome Characterization of Canine Retina Using High-Throughput Sequencing
Source: Genet Res Int. 2015 Dec 16;2015:638679. doi: 10.1155/2015/638679 (PMC4695645; doi:10.1155/2015/638679)
Supplement: Supplementary file 1 — The Additional File S1 contains the generated data after enrichment of genes in GO category. The sheet 4 contains the expression value of expressed genes which were involved in retina specific gene expression profiles. The Additional File S2 contains KEGG orthology assignment of Melanogenesis, phototransduction and retinol metabolism. [file 638679.f1.zip › 638679 Additional file S1.xlsx]

## Sheet: sheat 1
	The expressed genes in canine retina annotated to GO term Biological Process using DAVIDs functional annotation tool with reference to canis familairis
GO:0008104	protein localization	28	9.00322	0.000103611	RAB7A, MLPH, RAB5C, VPS52, PPT1, RAB1A, RAB11A, TRAM1, SEC61A1, RAB27A, AP3B1, RAB2A, GDI1, GDI2, RAB8A, SRP54, CUBN, RRBP1, STXBP2, MYH9, GNGT1, BAX, RAB22A, RAB5A, RAB12, SRP72, RAB10, SEC61G
GO:0015031	protein transport	26	8.36013	0.00015727	RAB7A, MLPH, RAB5C, VPS52, PPT1, RAB1A, RAB11A, TRAM1, SEC61A1, RAB27A, AP3B1, RAB2A, GDI1, GDI2, RAB8A, SRP54, CUBN, RRBP1, STXBP2, MYH9, RAB22A, RAB5A, RAB12, SRP72, RAB10, SEC61G
GO:0045184	establishment of protein localization	26	8.36013	0.00015727	RAB7A, MLPH, RAB5C, VPS52, PPT1, RAB1A, RAB11A, TRAM1, SEC61A1, RAB27A, AP3B1, RAB2A, GDI1, GDI2, RAB8A, SRP54, CUBN, RRBP1, STXBP2, MYH9, RAB22A, RAB5A, RAB12, SRP72, RAB10, SEC61G
GO:0006468	protein amino acid phosphorylation	23	7.3955	0.000189386	FGFR2, RNASEL, MAP2K1, FLT3, MAP2K2, ERBB2, MET, DSTYK, KIT, FER, PRKCD, LATS1, PDE6G, TRIB2, GUCY2D, KDR, IL12RB2, EIF2AK1, MAPK14, HIPK2, PDGFRB, PRKACA, AKT2
GO:0007242	intracellular signaling cascade	35	11.254	0.00117413	RP1, RAB7A, GNAI2, ADORA2B, RAB5C, ADCY5, LATS1, RAB1A, RAC1, RHOA, GUCY1A3, RAB11A, RAPGEF3, RAB27A, RAB2A, RAB8A, GDI2, ARHGEF2, PLEK, MET, PRKCD, PDE6G, GUCY2D, SSTR2, CCND1, UACA, GNAQ, PSEN1, GNB1, MAPK14, RAB22A, RAB5A, GUCY1B3, RAB12, RAB10
GO:0007264	small GTPase mediated signal transduction	15	4.82315	0.00214638	RAB2A, RAB7A, GDI2, RAB8A, RAB5C, RAB1A, RAC1, RAB22A, RAB5A, RHOA, RAB11A, RAB12, RAPGEF3, RAB10, RAB27A
GO:0006796	phosphate metabolic process	29	9.32476	0.00263351	FGFR2, ATP6V0E1, RNASEL, ERBB2, DSTYK, FER, KIT, LATS1, PTEN, TRIB2, IL12RB2, PRKACA, AKT2, MAP2K1, FLT3, MAP2K2, MET, PPP1CC, PRKCD, PDE6G, PPP1CB, GUCY2D, KDR, PPP1CA, EIF2AK1, MAPK14, DLD, HIPK2, PDGFRB
GO:0006793	phosphorus metabolic process	29	9.32476	0.00263351	FGFR2, ATP6V0E1, RNASEL, ERBB2, DSTYK, FER, KIT, LATS1, PTEN, TRIB2, IL12RB2, PRKACA, AKT2, MAP2K1, FLT3, MAP2K2, MET, PPP1CC, PRKCD, PDE6G, PPP1CB, GUCY2D, KDR, PPP1CA, EIF2AK1, MAPK14, DLD, HIPK2, PDGFRB
GO:0016192	vesicle-mediated transport	12	3.85852	0.00602272	RAB2A, CLN3, CUBN, STXBP2, RAB1A, ADRB2, NME2, TFRC, NME1, RAB5A, AP3B1, GHR, RAB27A
GO:0050953	sensory perception of light stimulus	17	5.46624	0.00672317	GNAT1, RP1, RPGR, RPE65, RCVRN, PRPH2, PDE6G, CNGA1, GUCY2D, SAG, PDE6A, PDE6B, PDE6D, PRCD, PDC, CLN5, RHO
GO:0007601	visual perception	17	5.46624	0.00672317	GNAT1, RP1, RPGR, RPE65, RCVRN, PRPH2, PDE6G, CNGA1, GUCY2D, SAG, PDE6A, PDE6B, PDE6D, PRCD, PDC, CLN5, RHO
GO:0009314	response to radiation	11	3.53698	0.0115692	GNAT1, GNGT1, SLC1A2, SLC1A3, UACA, CASP9, BAX, RCVRN, BCL2L1, SNAI2, RHO
GO:0007167	enzyme linked receptor protein signaling pathway	11	3.53698	0.0115692	MSX2, FUT8, FLT3, ERBB2, MET, PDGFRB, RPE65, ANGPT1, KIT, BMP7, KDR
GO:0016310	phosphorylation	25	8.03859	0.0153165	FGFR2, RNASEL, ATP6V0E1, ERBB2, DSTYK, FER, KIT, LATS1, TRIB2, IL12RB2, PRKACA, AKT2, MAP2K1, FLT3, MAP2K2, MET, PDE6G, PRKCD, GUCY2D, KDR, EIF2AK1, MAPK14, HIPK2, DLD, PDGFRB
GO:0009416	response to light stimulus	9	2.89389	0.0172267	GNAT1, GNGT1, SLC1A2, SLC1A3, UACA, CASP9, BAX, RCVRN, RHO
GO:0006897	endocytosis	8	2.57235	0.0336328	CLN3, NME2, ADRB2, CUBN, TFRC, NME1, RAB5A, GHR, AP3B1
GO:0010324	membrane invagination	8	2.57235	0.0336328	CLN3, NME2, ADRB2, CUBN, TFRC, NME1, RAB5A, GHR, AP3B1
GO:0007169	transmembrane receptor protein tyrosine kinase signaling pathway	8	2.57235	0.0336328	FLT3, ERBB2, MET, PDGFRB, RPE65, ANGPT1, KIT, KDR
GO:0007155	cell adhesion	18	5.78778	0.0348658	ICAM1, CNTNAP5, F8, PRPH2, SSPO, PNN, COL4A5, VCAM1, NCAM1, VWF, CD44, PSEN1, CD34, ACAN, CLDN2, EDA, ITGA2B, FN1
GO:0022610	biological adhesion	18	5.78778	0.0348658	ICAM1, CNTNAP5, F8, PRPH2, SSPO, PNN, COL4A5, VCAM1, NCAM1, VWF, CD44, PSEN1, CD34, ACAN, CLDN2, EDA, ITGA2B, FN1
GO:0043523	regulation of neuron apoptosis	6	1.92926	0.05154	CLN3, BDNF, CASP9, BAX, PPT1, BCL2L1
GO:0044265	cellular macromolecule catabolic process	13	4.18006	0.0518118	VHL, CYCS, RING1, PPT1, OAS2, MYH9, BRCA1, PSMB9, HSP90B1, PSEN1, BAX, MDM2, USP11
GO:0046907	intracellular transport	13	4.18006	0.0518118	SRP54, MLPH, UCP1, MYH9, NPC1, UCP2, BAX, ANP32A, SRP72, SEC61G, SEC61A1, AP3B1, RAB27A
GO:0009057	macromolecule catabolic process	14	4.50161	0.0526674	CLN3, VHL, CYCS, RING1, PPT1, OAS2, MYH9, BRCA1, PSMB9, HSP90B1, PSEN1, BAX, MDM2, USP11
GO:0051603	proteolysis involved in cellular protein catabolic process	9	2.89389	0.0767629	HSP90B1, PSEN1, VHL, RING1, MDM2, USP11, MYH9, BRCA1, PSMB9
GO:0030163	protein catabolic process	9	2.89389	0.0767629	HSP90B1, PSEN1, VHL, RING1, MDM2, USP11, MYH9, BRCA1, PSMB9
GO:0044257	cellular protein catabolic process	9	2.89389	0.0767629	HSP90B1, PSEN1, VHL, RING1, MDM2, USP11, MYH9, BRCA1, PSMB9
GO:0016044	membrane organization	10	3.21543	0.0796105	CLN3, NME2, ADRB2, CUBN, TFRC, NME1, BAX, RAB5A, PPT1, GHR, AP3B1
Term	GO Terms	Count	%	PValue	Genes
Total	28 GO terms

## Sheet: sheat 2
	The expressed genes in canine retina annotated to GO term Cellular Component using DAVIDs functional annotation tool with reference to canis familairis
Term	GO Terms	Count	%	PValue	Genes
GO:0044459	plasma membrane part	65	22.1843	0.000305765	CYB5R3, ATP1B1, CD8A, RAB5C, SLC6A3, UTRN, TLR2, GJA1, PNN, RABAC1, SLC1A2, SLC2A4, DLA-64, DLA88, RHOA, NOS3, KLRD1, AP3B1, CLN3, ARHGEF2, DLA-DQA1, CD40, VASP, NPC1, ADRB2, DLA-79, SGCG, CCR5, PSEN1, GNB1, CGN, RAB5A, CLDN2, EDA, RAB10, ITGA2B, CAV1, ERBB2, KCNA2, KCNA5, ABCA4, KCNMB1, PDE6A, IL12RB2, COL17A1, DMD, RAC1, SCNN1B, NPHP1, TES, RAB8A, CUBN, SLC6A12, MAOA, MAOB, ATP1A1, GNGT1, VWF, …
GO:0005773	vacuole	17	5.80205	0.000389318	RAB7A, CLN3, CUBN, GUSB, FGFRL1, STXBP2, ATP6V1G2, PPT1, CTSS, FUCA1, GLB1, TPP1, DLD, GALC, CTSD, CLN5, RAB27A
GO:0005794	Golgi apparatus	33	11.2628	0.000612509	CAV2, RAB7A, CAV1, CLCN3, FUT8, VPS52, PPT1, SLC35A1, SLC35A2, SLC35A3, RAB1A, RABAC1, SLC2A4, NOS3, EBAG9, RAB27A, AP3B1, RAB2A, CLN3, GDI2, ARHGEF2, RPGR, FUT10, ST6GALNAC2, B3GAT1, PTGDS, SULF2, PSEN1, SULF1, RAB12, PRNP, RAB10, CLN5
GO:0005768	endosome	13	4.43686	0.000738758	RAB7A, CLN3, CLCN3, CUBN, RAB5C, VPS52, ANXA2, SLC2A4, TFRC, RAB22A, RAB5A, RAB11A, RAB27A
GO:0042995	cell projection	21	7.16724	0.000931594	GNAT1, CLN3, ARHGEF2, RPGR, CUBN, PDPN, PPT1, MYH9, VASP, CNGA1, APP, SLC1A2, SLC1A3, GNB1, MTPN, DLD, PDC, RAB5A, GAD1, MYOC, RAB27A
GO:0009898	internal side of plasma membrane	17	5.80205	0.0010255	CYB5R3, RAB8A, RAB5C, MAOA, MAOB, PDE6A, GNGT1, TJP1, GNGT2, DMD, RAC1, RAB5A, RHOA, RAB10, TJP3, TJP2, AP3B1
GO:0005764	lysosome	15	5.11945	0.00156294	RAB7A, CLN3, CUBN, GUSB, FGFRL1, STXBP2, PPT1, CTSS, FUCA1, GLB1, TPP1, GALC, CTSD, CLN5, RAB27A
GO:0000323	lytic vacuole	15	5.11945	0.00156294	RAB7A, CLN3, CUBN, GUSB, FGFRL1, STXBP2, PPT1, CTSS, FUCA1, GLB1, TPP1, GALC, CTSD, CLN5, RAB27A
GO:0048770	pigment granule	12	4.09556	0.00158465	RAB2A, RAB7A, HSP90B1, TFRC, TPP1, RAB5C, RAC1, RAB5A, CTSD, ATP1A1, CANX, RAB27A
GO:0042470	melanosome	12	4.09556	0.00158465	RAB2A, RAB7A, HSP90B1, TFRC, TPP1, RAB5C, RAC1, RAB5A, CTSD, ATP1A1, CANX, RAB27A
GO:0031988	membrane-bounded vesicle	22	7.50853	0.00204267	RAB2A, RAB7A, CLN3, CLCN3, RAB5C, STXBP2, PPT1, ATP1A1, ATP6V1G2, CANX, RABAC1, VWF, HSP90B1, BDNF, TFRC, SLC2A4, TPP1, RAC1, DLD, RAB5A, CTSD, RAB27A
GO:0031982	vesicle	25	8.53242	0.00240678	RAB7A, CLCN3, RAB5C, PPT1, ATP6V1G2, CANX, RABAC1, BDNF, APP, SLC2A4, TPP1, RAC1, RAB27A, AP3B1, RAB2A, CLN3, ZDHHC8, STXBP2, ATP1A1, VWF, HSP90B1, TFRC, DLD, RAB5A, CTSD
GO:0016023	cytoplasmic membrane-bounded vesicle	21	7.16724	0.00352596	RAB2A, RAB7A, CLN3, RAB5C, STXBP2, PPT1, ATP1A1, ATP6V1G2, CANX, RABAC1, VWF, HSP90B1, BDNF, TFRC, SLC2A4, TPP1, RAC1, DLD, RAB5A, CTSD, RAB27A
GO:0031410	cytoplasmic vesicle	24	8.19113	0.00399202	RAB2A, CLN3, RAB7A, RAB5C, ZDHHC8, STXBP2, PPT1, ATP1A1, ATP6V1G2, CANX, RABAC1, VWF, HSP90B1, BDNF, APP, TFRC, SLC2A4, TPP1, RAC1, DLD, RAB5A, CTSD, AP3B1, RAB27A
GO:0012505	endomembrane system	21	7.16724	0.00622287	CLN3, CLCN3, CUBN, FUT8, RRBP1, FUT10, ATP6V1G2, SLC35A1, SLC35A2, SLC35A3, ST6GALNAC2, NPC1, UACA, PTGDS, BCHE, BAX, SPCS2, EDA, DDOST, SEC61G, SEC61A1
GO:0031090	organelle membrane	28	9.55631	0.0145236	CYB5R3, CLCN3, FUT8, ATP6V1G2, BCL2L1, SLC35A1, SLC35A2, SLC35A3, BCL2, CAT, DDOST, SEC61A1, CLN3, RRBP1, MAOA, FUT10, MAOB, UCP1, SLC3A1, PPP1CC, ST6GALNAC2, PTGDS, UCP2, BAX, SPCS2, EDA, SEC61G, CLN5
GO:0005783	endoplasmic reticulum	37	12.628	0.0146361	CYB5R3, RTN1, CANX, RAB1A, SSR1, TAPBP, BCHE, BCL2, ANP32A, TRAM1, DDOST, MYOC, SEC61A1, RAB2A, RHBDF2, CLN3, CUBN, SEC11C, RRBP1, SEC11A, TP53, VWF, NPC1, HSP90B1, ATP2A2, PTGDS, SULF2, PSEN1, BAX, PLN, SULF1, SPCS2, PRNP, EDA, SSR2, CLN5, SEC61G
GO:0044420	extracellular matrix part	10	3.41297	0.0178981	COL4A4, COL17A1, SLC1A3, ACAN, COL1A2, COL2A1, COL1A1, TIMP2, COL4A5, ANXA2
GO:0031225	anchored to membrane	12	4.09556	0.0227262	RAB2A, PDE6B, RAB5C, RAB22A, RAB5A, VNN1, RPE65, GNAS, RAB12, CNTFR, INPP5A, RAB27A
GO:0005578	proteinaceous extracellular matrix	16	5.46075	0.0262462	TFIP11, COL4A4, OPTC, COL2A1, DCN, TIMP2, COL4A5, ANXA2, VWF, COL17A1, BGN, SLC1A3, ACAN, COL1A2, COL1A1, FN1
GO:0005929	cilium	8	2.73038	0.0286996	GNAT1, APP, RPGR, GNB1, PDC, CNGA1, MYOC, RAB27A
GO:0005886	plasma membrane	102	34.8123	0.0367543	ATP1B1, SLC6A3, UTRN, TLR2, RPE65, PNN, SLC2A4, DLA-64, DLA88, VNN1, PRKACA, KLRD1, C5AR1, PDPN, LIFR, CD40, MYH9, NPC1, SSTR2, DLA-79, CCR5, CGN, RAB10, EDA, ITGA2B, CAV2, CAV1, ADORA2B, DRD2, ERBB2, KCNA2, PTH1R, DAG1, CNTFR, KCNA5, ABCA4, KCNMB1, PDE6A, IL12RB2, DMD, RAC1, NPHP1, RAB8A, CUBN, MAOA, SLC6A12, MAOB, GNGT1, GNGT2, ADRA1B, CYB5R3, CD8A, RAB5C, GJA1, CXCR2, CD97, RABAC1, EDNRA, SLC1…
GO:0048471	perinuclear region of cytoplasm	10	3.41297	0.0373548	APP, NPC1, UACA, TFRC, PTGDS, SLC2A4, LEPREL2, RHPN2, ANP32A, GNB3, CLN5
GO:0031012	extracellular matrix	16	5.46075	0.0414973	TFIP11, COL4A4, OPTC, COL2A1, DCN, TIMP2, COL4A5, ANXA2, VWF, COL17A1, BGN, SLC1A3, ACAN, COL1A2, COL1A1, FN1
GO:0019867	outer membrane	6	2.04778	0.0457083	CYB5R3, BAX, BCL2, MAOA, MAOB, PPP1CC
GO:0031968	organelle outer membrane	6	2.04778	0.0457083	CYB5R3, BAX, BCL2, MAOA, MAOB, PPP1CC
GO:0005741	mitochondrial outer membrane	6	2.04778	0.0457083	CYB5R3, BAX, BCL2, MAOA, MAOB, PPP1CC
GO:0030135	coated vesicle	6	2.04778	0.0457083	RABAC1, VWF, CLN3, SLC2A4, PPT1, ATP6V1G2
GO:0030136	clathrin-coated vesicle	6	2.04778	0.0457083	RABAC1, VWF, CLN3, SLC2A4, PPT1, ATP6V1G2
GO:0070013	intracellular organelle lumen	15	5.11945	0.0638803	MCL1, CYCS, SRP68, TP53, RING1, PNN, CRX, HSP90B1, PPP1CA, DLD, ANP32A, MDM2, AKAP8, TCF4, CLN5
GO:0005829	cytosol	14	4.77816	0.0654301	LOC480784, LOC609402, CYCS, STXBP2, PPT1, ATP6V1G2, BCL2L1, PFKM, MYH9, PSMB9, RPS18, UACA, CDKN1B, CASP9, BAX
GO:0043233	organelle lumen	15	5.11945	0.0923678	MCL1, CYCS, SRP68, TP53, RING1, PNN, CRX, HSP90B1, PPP1CA, DLD, ANP32A, MDM2, AKAP8, TCF4, CLN5
GO:0031252	cell leading edge	5	1.70648	0.0951966	SLC1A2, PDPN, RAB5A, MYH9, VASP
GO:0005581	collagen	5	1.70648	0.0951966	COL4A4, COL1A2, COL2A1, COL1A1, COL4A5
Total	34 GO Terms

## Sheet: sheat 3
	The expressed genes in canine retina annotated to GO term Molecular Function using DAVID functional annotation tool with reference to canis familairis
Term	GO Terms	Count	%	PValue	Genes
GO:0032555	purine ribonucleotide binding	70	22.1519	1.229e-08	RNASEL, RAB5C, ADCY5, DSTYK, HSP70, FER, LATS1, RAB1A, ACTR1A, RHOA, GUCY1A3, PRKACA, TUBG1, MX1, AKT2, RAB27A, TP53, PFKM, MYH9, PRKCD, CNGA1, NME2, GLUL, EIF2AK1, GNAQ, NME1, HIPK2, PDE5A, RAB5A, PEBP1, PDGFRB, GNAS, GUCY1B3, RAB12, RAB10, FGFR2, RAB7A, GNAI2, ERBB2, OAS3, PRKDC, OAS1, OAS2, KIT, ABCA4, TRIB2, RAC1, RAB11A, HSPA4, RAB2A, GNAT1, SRP54, RAB8A, MAP2K1, MAP2K2, FLT3, AK1, MET, ATP1…
GO:0032553	ribonucleotide binding	70	22.1519	1.229e-08	RNASEL, RAB5C, ADCY5, DSTYK, HSP70, FER, LATS1, RAB1A, ACTR1A, RHOA, GUCY1A3, PRKACA, TUBG1, MX1, AKT2, RAB27A, TP53, PFKM, MYH9, PRKCD, CNGA1, NME2, GLUL, EIF2AK1, GNAQ, NME1, HIPK2, PDE5A, RAB5A, PEBP1, PDGFRB, GNAS, GUCY1B3, RAB12, RAB10, FGFR2, RAB7A, GNAI2, ERBB2, OAS3, PRKDC, OAS1, OAS2, KIT, ABCA4, TRIB2, RAC1, RAB11A, HSPA4, RAB2A, GNAT1, SRP54, RAB8A, MAP2K1, MAP2K2, FLT3, AK1, MET, ATP1…
GO:0000166	nucleotide binding	75	23.7342	1.27713e-07	RNASEL, RAB5C, ADCY5, DSTYK, HSP70, FER, LATS1, RAB1A, ACTR1A, RHOA, GUCY1A3, NOS3, RBM47, PRKACA, TUBG1, MX1, RAB27A, AKT2, TP53, PFKM, MYH9, PRKCD, CNGA1, NME2, GLUL, EIF2AK1, GNAQ, NME1, HIPK2, DLD, PDE5A, RAB5A, PEBP1, PDGFRB, GNAS, GUCY1B3, RAB12, RAB10, FGFR2, RAB7A, GNAI2, ERBB2, OAS3, PRKDC, OAS1, OAS2, KIT, ABCA4, TRIB2, RAC1, LOC610978, RAB11A, HSPA4, GAPDH, RAB2A, GNAT1, SRP54, RAB8A, …
GO:0017076	purine nucleotide binding	73	23.1013	3.63435e-07	RNASEL, RAB5C, ADCY5, DSTYK, HSP70, FER, LATS1, RAB1A, ACTR1A, RHOA, GUCY1A3, NOS3, PRKACA, TUBG1, MX1, AKT2, RAB27A, TP53, PFKM, MYH9, PRKCD, CNGA1, NME2, GLUL, EIF2AK1, GNAQ, NME1, HIPK2, DLD, PDE5A, RAB5A, PEBP1, PDGFRB, GNAS, GUCY1B3, RAB12, RAB10, FGFR2, RAB7A, GNAI2, ERBB2, OAS3, PRKDC, OAS1, OAS2, KIT, ABCA4, TRIB2, RAC1, RAB11A, HSPA4, RAB2A, GNAT1, SRP54, RAB8A, NOX5, MAP2K1, MAP2K2, FLT…
GO:0004672	protein kinase activity	23	7.27848	4.37007e-05	FGFR2, RNASEL, MAP2K1, FLT3, MAP2K2, ERBB2, MET, PRKDC, DSTYK, FER, KIT, PRKCD, LATS1, TRIB2, GUCY2D, KDR, CCND1, EIF2AK1, MAPK14, HIPK2, PDGFRB, PRKACA, AKT2
GO:0032559	adenyl ribonucleotide binding	44	13.9241	9.18384e-05	FGFR2, RNASEL, ADCY5, ERBB2, OAS3, DSTYK, PRKDC, HSP70, OAS1, KIT, FER, OAS2, ABCA4, LATS1, TRIB2, ACTR1A, HSPA4, PRKACA, AKT2, MAP2K1, FLT3, MAP2K2, AK1, MET, TP53, ABCB1, ATP1A1, PFKM, MYH9, PRKCD, ABCG2, KDR, GUCY2D, NME2, P2RX7, HSP90B1, GLUL, EIF2AK1, ATP2A2, NME1, MAPK14, HIPK2, PDGFRB, PEBP1, ABCC1
GO:0005524	ATP binding	44	13.9241	9.18384e-05	FGFR2, RNASEL, ADCY5, ERBB2, OAS3, DSTYK, PRKDC, HSP70, OAS1, KIT, FER, OAS2, ABCA4, LATS1, TRIB2, ACTR1A, HSPA4, PRKACA, AKT2, MAP2K1, FLT3, MAP2K2, AK1, MET, TP53, ABCB1, ATP1A1, PFKM, MYH9, PRKCD, ABCG2, KDR, GUCY2D, NME2, P2RX7, HSP90B1, GLUL, EIF2AK1, ATP2A2, NME1, MAPK14, HIPK2, PDGFRB, PEBP1, ABCC1
GO:0019001	guanyl nucleotide binding	27	8.5443	0.000148764	RAB7A, GNAI2, RAB5C, RAB1A, RAC1, RHOA, GUCY1A3, RAB11A, TUBG1, MX1, RAB27A, GNAT1, RAB2A, RAB8A, SRP54, PDE6G, CNGA1, GUCY2D, GNAQ, PDE5A, RAB22A, RAB5A, GNAS, GUCY1B3, RAB12, RAB10, DNM1
GO:0032561	guanyl ribonucleotide binding	27	8.5443	0.000148764	RAB7A, GNAI2, RAB5C, RAB1A, RAC1, RHOA, GUCY1A3, RAB11A, TUBG1, MX1, RAB27A, GNAT1, RAB2A, RAB8A, SRP54, PDE6G, CNGA1, GUCY2D, GNAQ, PDE5A, RAB22A, RAB5A, GNAS, GUCY1B3, RAB12, RAB10, DNM1
GO:0001883	purine nucleoside binding	51	16.1392	0.0003359	RNASEL, ADCY5, DSTYK, HSP70, FER, LATS1, ACTR1A, PRKACA, NOS3, AKT2, TP53, PFKM, MYH9, PRKCD, CNGA1, NME2, GLUL, EIF2AK1, NME1, PDE5A, DLD, HIPK2, PDGFRB, PEBP1, FGFR2, ERBB2, OAS3, PRKDC, OAS1, KIT, OAS2, ABCA4, TRIB2, HSPA4, SRP54, NOX5, MAP2K1, MAP2K2, FLT3, AK1, MET, ABCB1, ATP1A1, PDE6G, ABCG2, KDR, GUCY2D, P2RX7, HSP90B1, ATP2A2, MAPK14, ABCC1
GO:0001882	nucleoside binding	51	16.1392	0.0003359	RNASEL, ADCY5, DSTYK, HSP70, FER, LATS1, ACTR1A, PRKACA, NOS3, AKT2, TP53, PFKM, MYH9, PRKCD, CNGA1, NME2, GLUL, EIF2AK1, NME1, PDE5A, DLD, HIPK2, PDGFRB, PEBP1, FGFR2, ERBB2, OAS3, PRKDC, OAS1, KIT, OAS2, ABCA4, TRIB2, HSPA4, SRP54, NOX5, MAP2K1, MAP2K2, FLT3, AK1, MET, ABCB1, ATP1A1, PDE6G, ABCG2, KDR, GUCY2D, P2RX7, HSP90B1, ATP2A2, MAPK14, ABCC1
GO:0005525	GTP binding	24	7.59494	0.000387483	GNAT1, RAB2A, RAB7A, SRP54, RAB8A, GNAI2, RAB5C, RAB1A, GUCY2D, GNAQ, RAB22A, RAC1, RHOA, RAB5A, GUCY1A3, RAB11A, GNAS, RAB12, GUCY1B3, TUBG1, RAB10, MX1, DNM1, RAB27A
GO:0030554	adenyl nucleotide binding	47	14.8734	0.00114172	FGFR2, RNASEL, ADCY5, ERBB2, OAS3, DSTYK, PRKDC, HSP70, OAS1, KIT, FER, OAS2, ABCA4, LATS1, TRIB2, ACTR1A, HSPA4, NOS3, PRKACA, AKT2, NOX5, MAP2K1, FLT3, MAP2K2, AK1, MET, TP53, ABCB1, ATP1A1, PFKM, MYH9, PRKCD, ABCG2, KDR, GUCY2D, NME2, P2RX7, HSP90B1, GLUL, EIF2AK1, ATP2A2, NME1, MAPK14, DLD, HIPK2, PDGFRB, PEBP1, ABCC1
GO:0004713	protein tyrosine kinase activity	11	3.48101	0.00541157	FGFR2, RNASEL, FLT3, MAP2K2, ERBB2, MET, PDGFRB, DSTYK, KIT, FER, KDR
GO:0019904	protein domain specific binding	9	2.8481	0.00665996	CLCN3, TJP1, FUT8, BAX, QKI, ID3, SCNN1B, PTEN, VASP
GO:0004674	protein serine/threonine kinase activity	11	3.48101	0.0144471	EIF2AK1, MAP2K1, MAP2K2, MAPK14, HIPK2, PRKDC, DSTYK, PRKACA, PRKCD, LATS1, AKT2
GO:0008270	zinc ion binding	33	10.443	0.0156975	PPARA, PPARD, MLPH, UTRN, ZNF331, ZNF252, RNF141, SMAP1, DMD, SLC39A7, RARA, NOS3, UNK, KDM5C, TES, ESRRA, ARHGEF2, ZDHHC5, ZDHHC8, RING1, TP53, NR4A1, SNAI2, SOD1, PRKCD, BIRC2, BRCA1, ZBED5, PDE5A, MDM2, ZFPM2, AKAP8, ZBTB1
GO:0016791	phosphatase activity	9	2.8481	0.0207259	PPP1CA, MAP2K1, PPP2CA, PON2, ATP1A1, PPP1CC, PTEN, PPP1CB, INPP5A
GO:0060589	nucleoside-triphosphatase regulator activity	9	2.8481	0.0207259	DLC1, GDI1, GDI2, ARHGEF2, SMAP1, RPGR, MLPH, PLN, RAPGEF3
GO:0015294	solute:cation symporter activity	12	3.79747	0.0351095	SLC1A2, SLC1A3, SLC2A4, SLC6A3, SLC6A12, SLC12A4, SLC2A1, SLC6A6, SLC35A1, SLC35A2, SLC1A1, SLC35A3
GO:0015293	symporter activity	13	4.11392	0.0382022	SLC5A3, SLC6A12, SLC12A4, SLC6A3, SLC35A1, SLC35A2, SLC35A3, SLC1A2, SLC1A3, SLC2A4, SLC2A1, SLC6A6, SLC1A1
GO:0030695	GTPase regulator activity	8	2.53165	0.0394044	DLC1, GDI1, GDI2, ARHGEF2, SMAP1, RPGR, MLPH, RAPGEF3
GO:0004114	3',5'-cyclic-nucleotide phosphodiesterase activity	6	1.89873	0.0581427	PDE6A, PDE6B, PDE6D, PDE5A, PDE1A, PDE6G
GO:0008081	phosphoric diester hydrolase activity	6	1.89873	0.0581427	PDE6A, PDE6B, PDE6D, PDE5A, PDE1A, PDE6G
GO:0004112	cyclic-nucleotide phosphodiesterase activity	6	1.89873	0.0581427	PDE6A, PDE6B, PDE6D, PDE5A, PDE1A, PDE6G
GO:0004714	transmembrane receptor protein tyrosine kinase activity	6	1.89873	0.0581427	FLT3, ERBB2, MET, PDGFRB, KIT, KDR
GO:0004721	phosphoprotein phosphatase activity	6	1.89873	0.0581427	PPP1CA, MAP2K1, PPP2CA, PPP1CC, PTEN, PPP1CB
Total	27 GO Terms

## Sheet: sheat 4
Genes related to Retina and also available in RetNet database
Genes expressed	Gene expression in RPKM value
RHO	743.832
GNAT1	276.252
ITM2B	253.701
TIMP3	213.486
EFEMP1	207.373
SAG	179.79
RBP4	125.93
PRPH2	109.087
PDE6G	80.3785
AIPL1	73.4784
RLBP1	72.7595
RPE65	63.2955
UNC119	60.8482
COL9A1	56.3231
PDE6A	56.2567
COL2A1	52.428
CABP4	51.2175
GUCA1B	50.2326
RS1	46.1539
ARL2BP	46.0626
CRX	42.0682
GUCA1A	39.9549
OAT	37.7345
ROM1	33.5621
NRL	31.4926
PGK1	29.2571
MKKS	28.2773
OTX2	26.411
SLC24A1	26.1188
OPN1LW	24.3809
TULP1	24.1702
IDH3B	23.6109
TRPM1	23.6071
PDE6B	23.3758
PRPF8	22.696
IMPG1	22.2741
RGR	21.9343
VCAN	20.528
RBP3	20.4087
ABCA4	19.8957
PRPF6	19.1004
CDHR1	18.909
RP1	18.0285
RDH12	17.9175
SNRNP200	17.9123
ELOVL4	17.4263
MAK	17.1548
DMD	16.8987
BBS4	16.0163
JAG1	15.989
RB1	15.9829
PRCD	15.8675
CNGA1	15.6984
CNGB1	14.6286
GRK1	14.4936
ADAM9	14.4238
RD3	14.3148
KCNJ13	13.595
PROM1	13.5863
LRAT	12.6108
CDH3	12.187
IMPG2	12.1351
IMPDH1	11.8391
CACNA2D4	11.6868
TSPAN12	11.3412
MFN2	11.2026
RGS9BP	10.882
SPATA7	10.2239
NR2E3	9.78813
GUCY2D	9.50499
KCNV2	9.41283
C1QTNF5	9.40868
CLRN1	9.38388
BBS2	9.30484
PDE6H	8.82064
RGS9	8.77113
PRPF31	8.59811
GNPTG	8.48201
PLA2G5	8.34286
TIMM8A	8.31687
TEAD1	8.2846
CACNA1F	8.12423
ABHD12	7.64596
CNNM4	7.63554
MYO7A	7.37397
NPHP1	7.19276
IFT140	6.81919
GPR125	6.60984
PRPF3	6.58376
RPGR	6.57767
CLN3	6.17989
MFRP	5.97586
SEMA4A	5.85785
ACBD5	5.75742
TMEM237	5.70452
BBS1	5.51309
TMEM126A	5.33943
PEX1	5.16635
EMC1	5.03008
TTC8	4.96229
PANK2	4.82988
BBIP1	4.80164
MKS1	4.71473
OFD1	4.69607
INPP5E	4.52366
KLHL7	4.51474
ALMS1	4.4904
GRM6	4.47282
RDH5	4.25001
OPN1SW	4.03585
FAM161A	3.97723
CC2D2A	3.97649
BBS9	3.93666
CEP290	3.92172
PDE6C	3.8166
FZD4	3.74907
WDR19	3.66216
NPHP3	3.55488
CAPN5	3.45743
WFS1	3.36448
DHDDS	3.28681
CRB1	3.27773
PEX7	3.24585
GNAT2	3.07748
DFNB31	2.99547
AHI1	2.95813
RAB28	2.92892
LRP5	2.92198
LCA5	2.88618
RAX2	2.81913
TREX1	2.77085
USH2A	2.72194
ADAMTS18	2.62638
RP2	2.40949
ZNF423	2.35997
CHM	2.29013
RPGRIP1	2.13577
SDCCAG8	2.03407
TTPA	2.00957
PCDH15	1.92446
FLVCR1	1.89006
RP1L1	1.83391
OPA3	1.81551
GPR179	1.78119
GPR98	1.6645
FSCN2	1.58959
WDPCP	1.58205
TRIM32	1.49396
EYS	1.4891
MERTK	1.44114
COL11A1	1.43552
RIMS1	1.37384
TOPORS	1.2072
NPHP4	1.06173
INVS	0.963274
CEP164	0.874599
ATXN7	0.71699
HMCN1	0.59202
CDH23	0.494208
KIAA1549	0.437192
Total = 160 genes
